# Supplementary material for: An analysis of degradation in low-cost particulate matter sensors
Source: Royal Society of Chemistry journal article supplement (doi:10.1039/d2ea00142j), 2023-01-01
Supplement: d2ea00142j1.pdf [file d2ea00142j1.pdf]

# Supplementary Information:

An analysis of degradation in low-cost particulate matter sensors

Priyanka deSouza<sup>1,2\*</sup>, Karoline Barkjohn<sup>3</sup>, Andrea Clements<sup>3</sup>, Jenny Lee<sup>4</sup>, Ralph Kahn<sup>5</sup>, Ben Crawford<sup>6</sup>, Patrick Kinney<sup>7</sup>

1: Department of Urban and Regional Planning, University of Colorado Denver, Denver CO, 80202, USA

2: CU Population Center, University of Colorado Boulder, Boulder CO, 80302, USA

3: Office of Research and Development, US Environmental Protection Agency, 109 T.W. Alexander Drive, Research Triangle Park, NC 27711, USA

4: Department of Biostatistics, Harvard T.H. Chan School of Public Health, Boston, MA 02115, USA

5: NASA Goddard Space Flight Center, Greenbelt, MA, 20771, USA

6: Department of Geography and Environmental Sciences, University of Colorado Denver, 80202, USA

7: Boston University School of Public Health, Boston, MA, 02118 USA

\*: Corresponding author [priyanka.desouza@ucdenver.edu](mailto:priyanka.desouza@ucdenver.edu)

# Figures

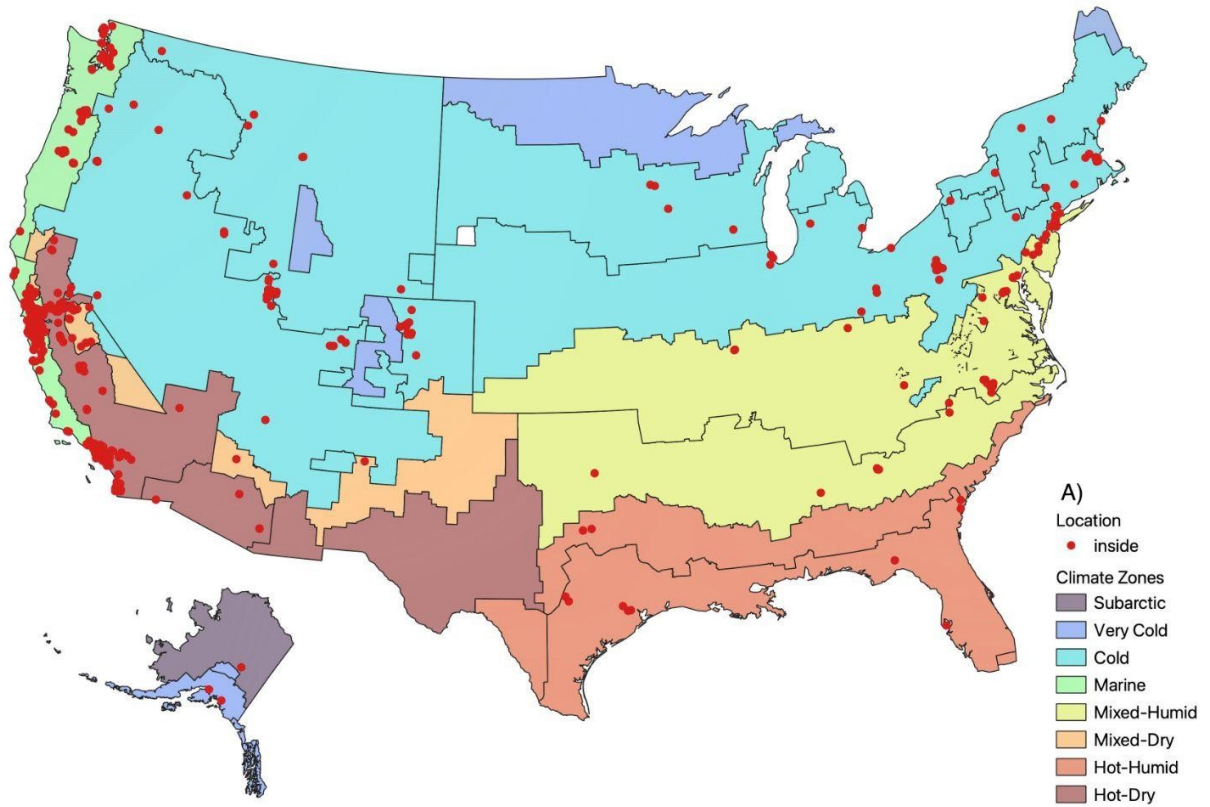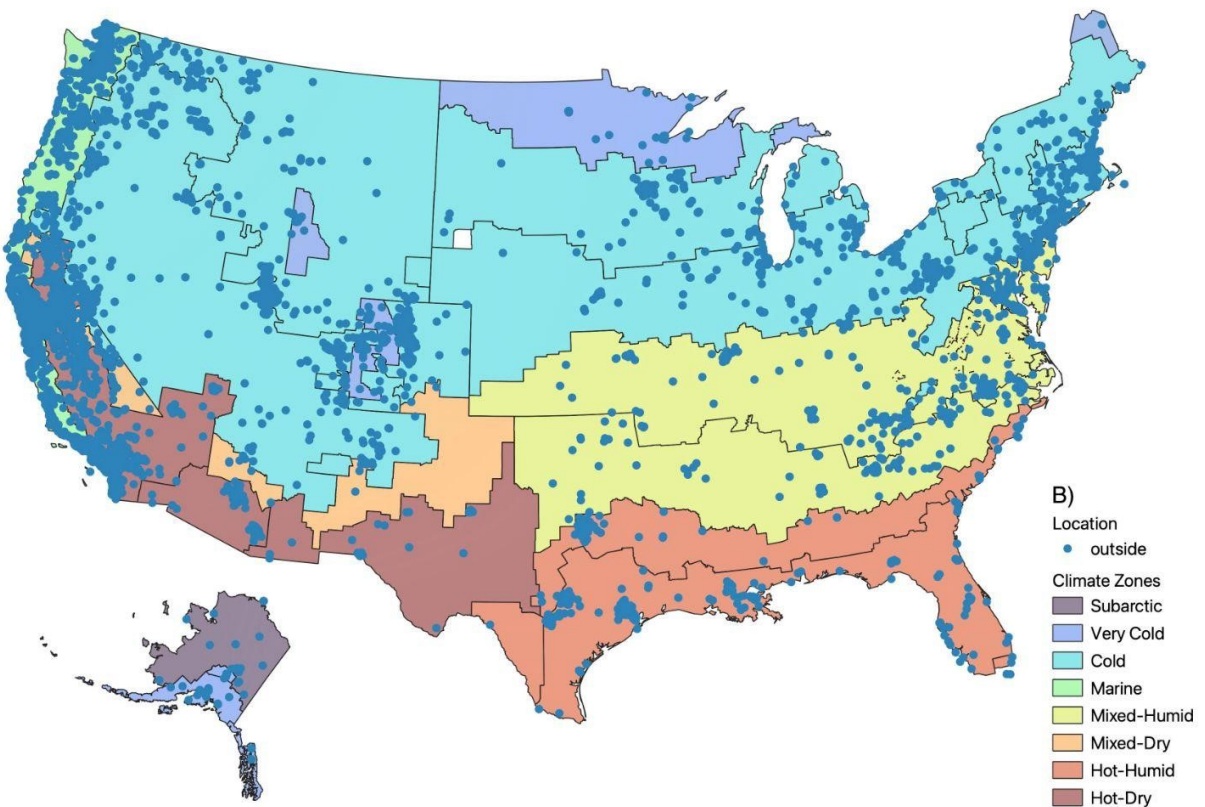

**Figure S1:** A) Indoor and B) Outdoor PurpleAir monitors in the United States (Hawaii is not displayed) considered in this study

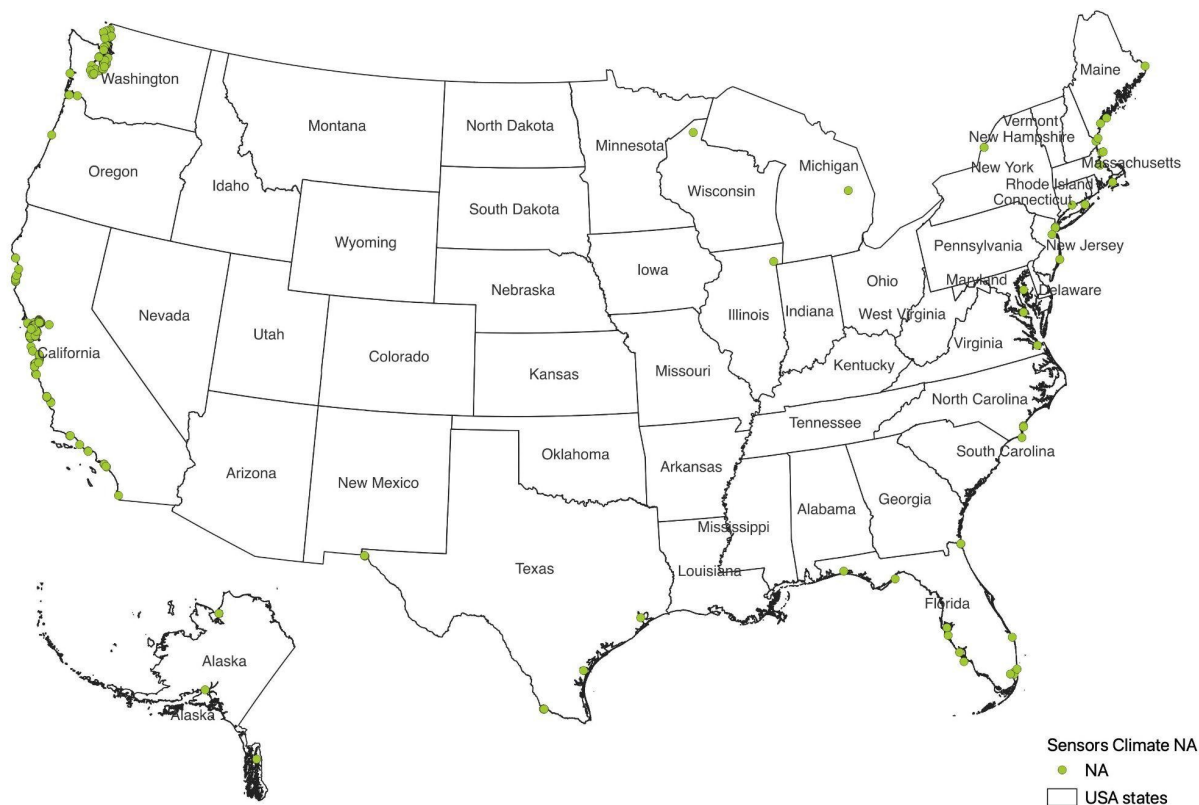

**Figure S2:** Sensors for which we did not have climate information

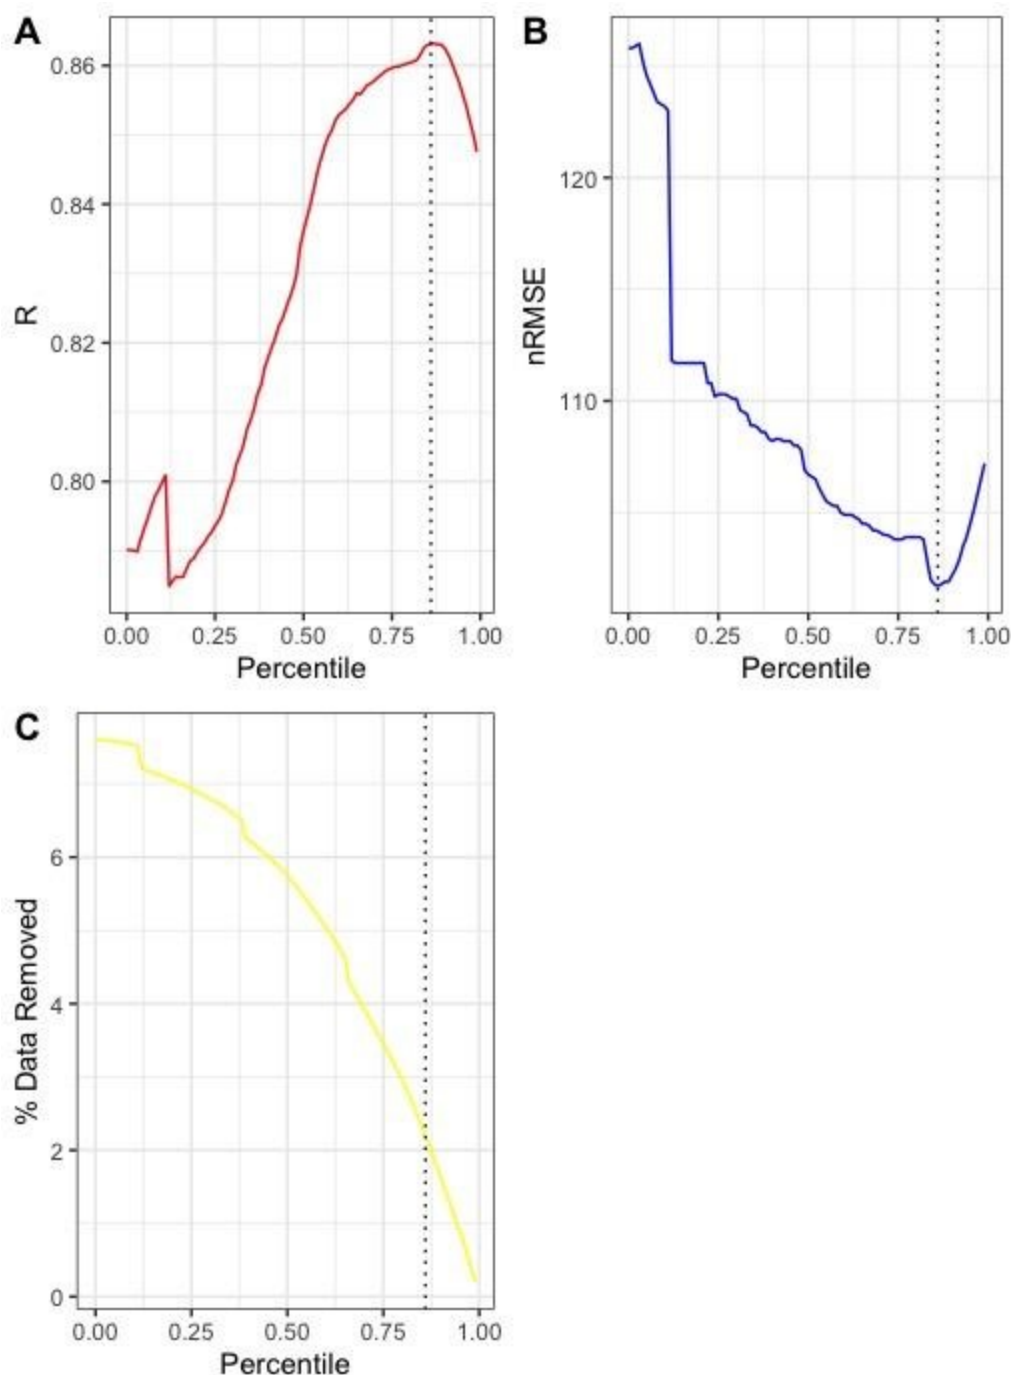

**Figure S3:** Agreement between the hourly PurpleAir measurements and the corresponding reference measurements from instruments not relying on the principles of light scattering, where measurements are flagged and removed based on the criterion  $| \text{channel A} - \text{channel B} | < 5 \mu\text{g}/\text{m}^3$  and the % difference between channels A and B:  $\frac{\text{abs}(A - B) \times 2}{(A + B)} > x$   $x$ th percentile of the percentage difference between A and B for each PurpleAir sensor, where we vary  $x$  between 0 - 0.99, captured by: A) Pearson



correlation coefficient ( $R$ ), and  $B$ ) normalized root mean square error ( $nRMSE$ ) metrics comparing unflagged measurements and the corresponding reference data based on different threshold percentile values. C) The % of measurements that were removed (because they were flagged) when evaluating  $R$  and  $nRMSE$ , for different percentile thresholds applied to the data are also displayed. The dotted vertical line represents the 86th percentile which corresponds to the lowest  $nRMSE$  and the highest  $R$ .

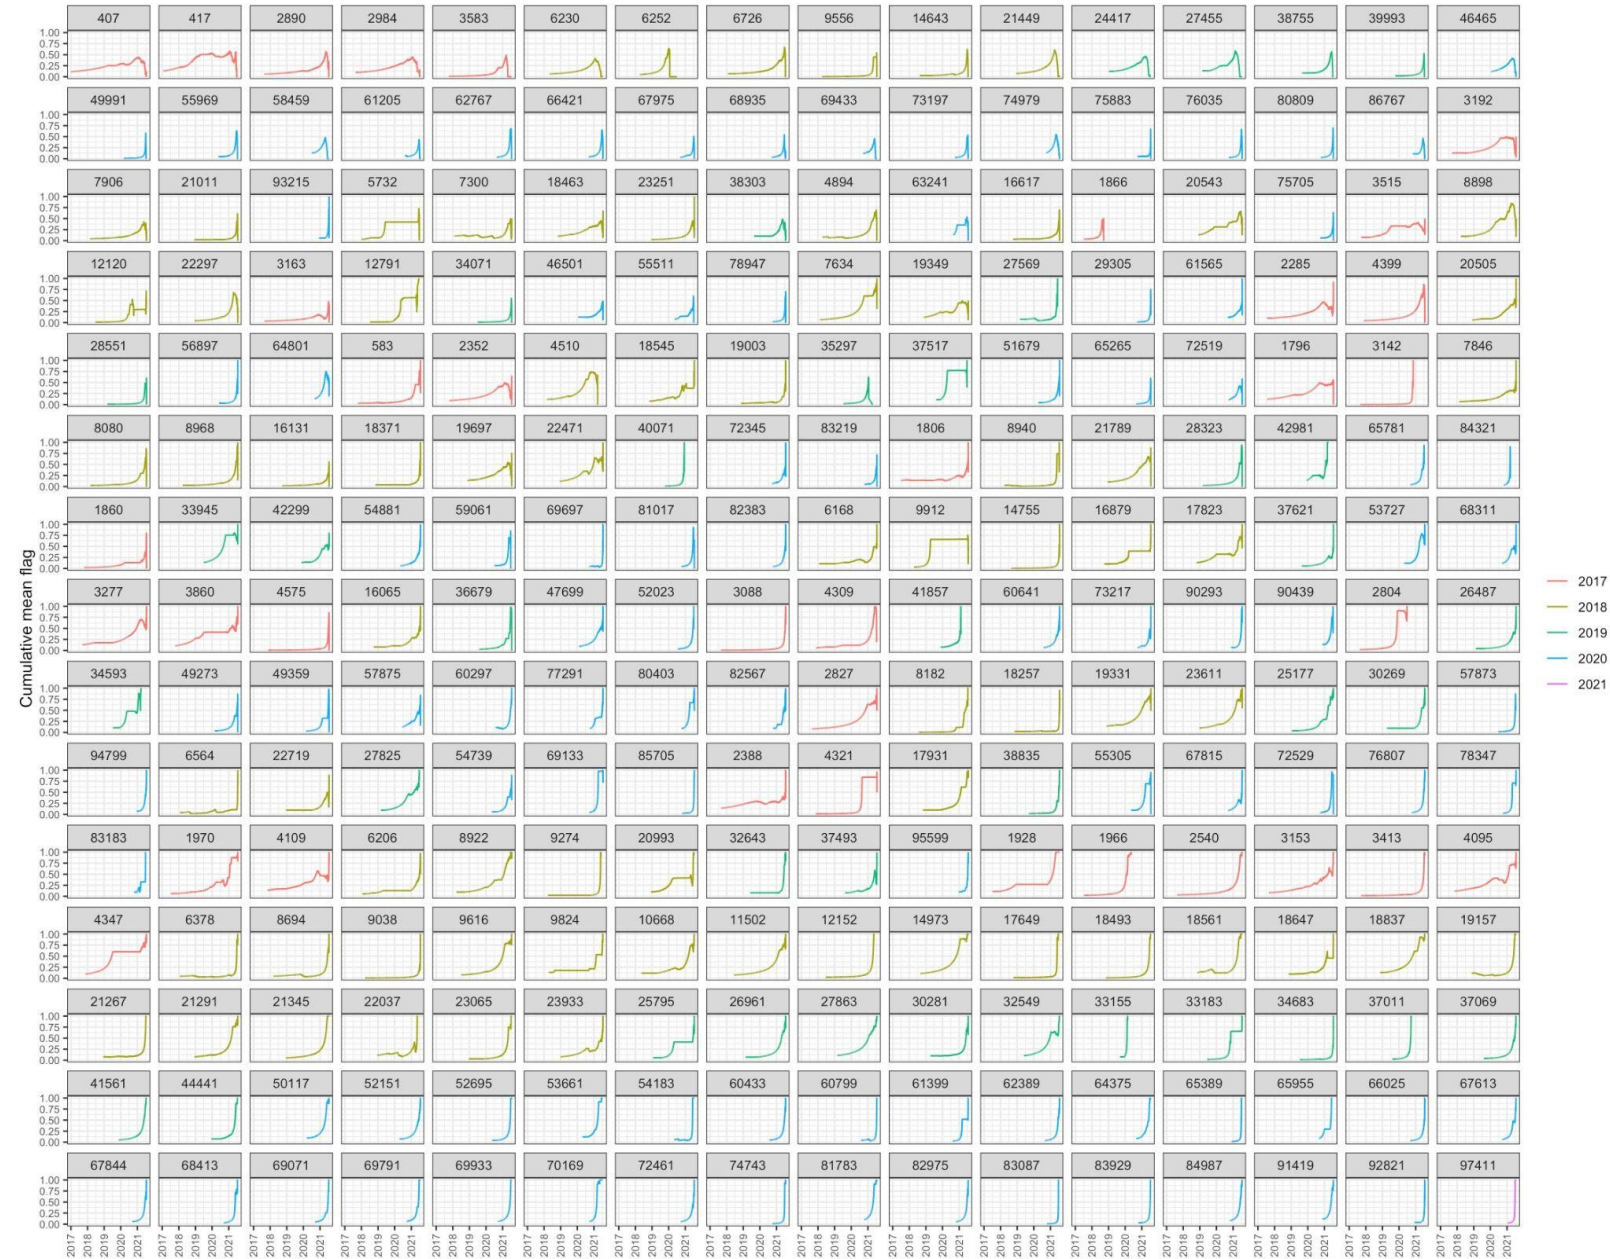

**Figure S4:** Cumulative mean of the flagged indicator at every hour of measurement calculated by averaging the flag indicator at the hour of measurement and for all subsequent hours for permanently degraded monitors (defined as sensors that record a

*cumulative mean flagged indicator > 0.4 for at least 100 hours of operation). The title of each subplot corresponds to the PurpleAir monitor ID*

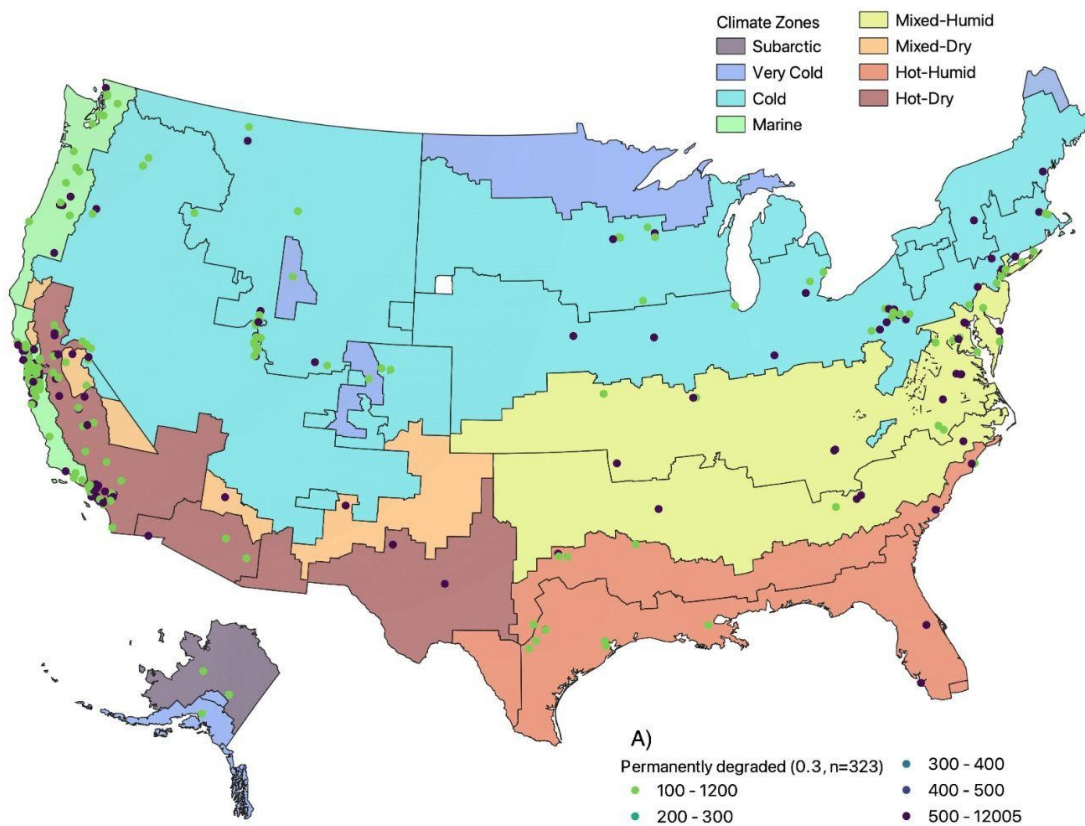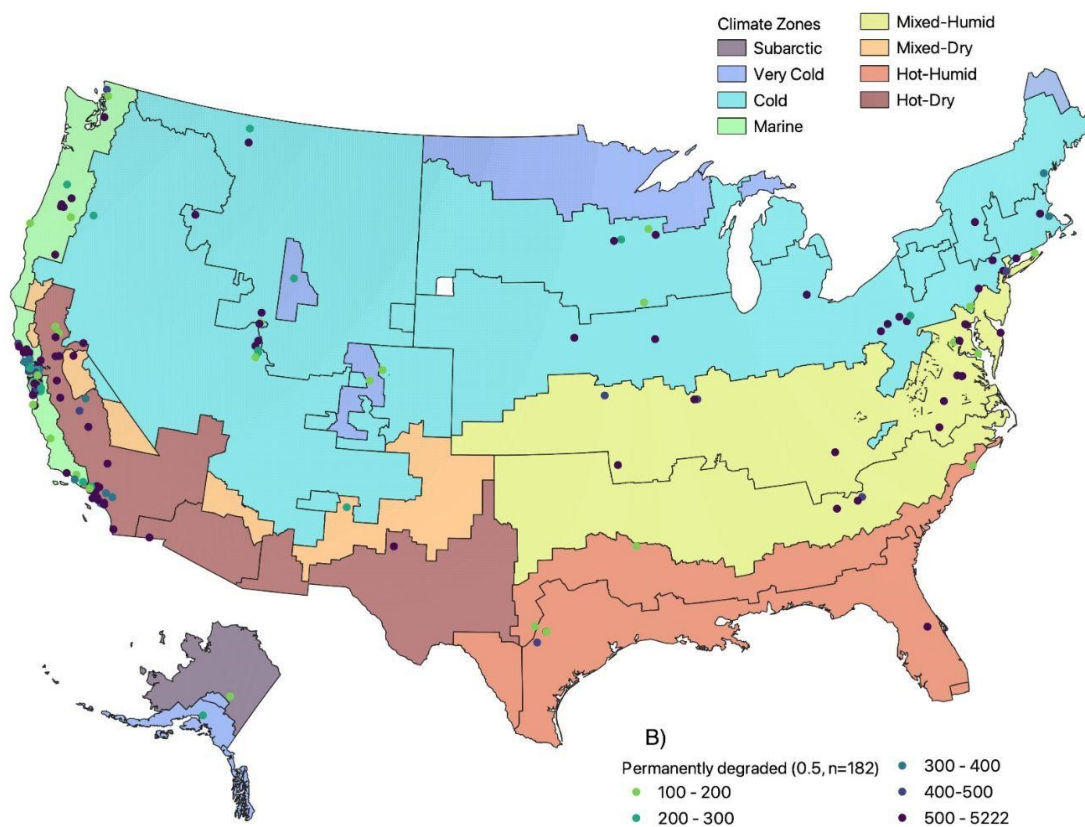



**Figure S5:** Map of permanently degraded PurpleAir monitors with at least 100 measurements for which the cumulative mean of the flag indicator is A)  $\geq 0.3$ , B)  $\geq 0.5$ . The number of hours of operation for which the cumulative mean of the flag indicator is above the threshold is displayed for each monitor

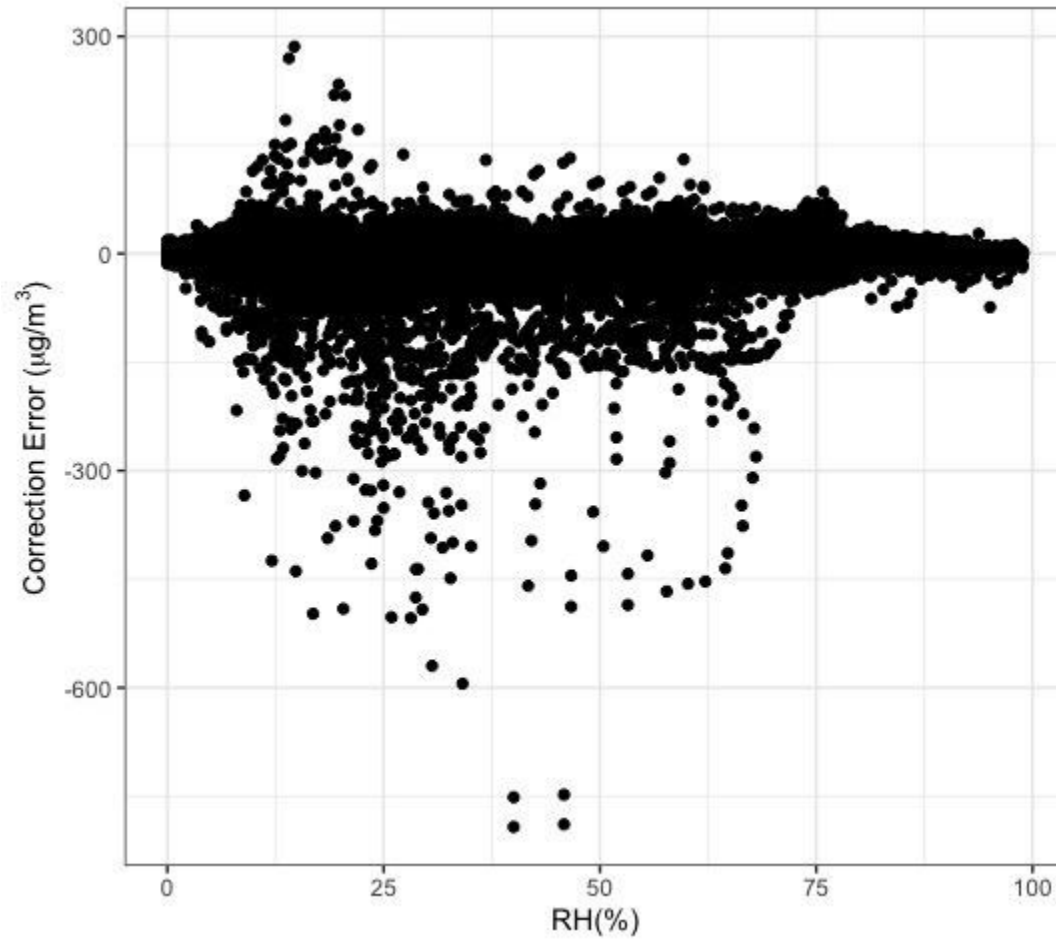

**Figure S6:** Correction error versus RH

# Tables

**Table S1:** Summary statistics of measurements and period of operation of PurpleAir monitors considered in this study by state

| State       | Number of monitors | Number of measurements | Hours of operation per monitor (Min/Max, Mean, Median) |
|-------------|--------------------|------------------------|--------------------------------------------------------|
| Alabama     | 18                 | 253,307                | Min/Max: 0/36,582<br>Mean: 15,780<br>Median: 15,228    |
| Alaska      | 89                 | 1,237,656              | Min/Max:0/30,515<br>Mean: 11,041<br>Median:10,585      |
| Arizona     | 100                | 809,779                | Min/Max:0/34,237<br>Mean:10,252<br>Median:7,753        |
| Arkansas    | 12                 | 179,239                | Min/Max:0/28,202<br>Mean:10,995<br>Median:10,436       |
| California  | 7303               | 66,788,259             | Min/Max:0/40,077<br>Mean:9,798<br>Median:6,998         |
| Colorado    | 441                | 3,966,682              | Min/Max:0/34,946<br>Mean:10,971<br>Median: 8,847       |
| Connecticut | 17                 | 194,088                | Min/Max:0/33,610<br>Mean:12,509<br>Median:11,306       |
| Delaware    | 26                 | 124,833                | Min/Max:0/34,052<br>Mean:12,043<br>Median:13,322       |
| D.C         | 10                 | 90,458                 | Min/Max: 0/26,484<br>Mean: 8,887<br>Median: 6,861      |
| Florida     | 49                 | 525,499                | Min/Max:0/34,237<br>Mean: 12,468<br>Median:11,309      |
| Georgia     | 60                 | 540,393                | Min/Max:0/34,453<br>Mean: 9,284<br>Median: 6,912       |
| Hawaii      | 41                 | 637,328                | Min/Max:0/35,119                                       |

|                      |     |         |                                                   |
|----------------------|-----|---------|---------------------------------------------------|
|                      |     |         | Mean: 13,687<br>Median:13,061                     |
| <b>Idaho</b>         | 75  | 599,536 | Min/Max:0/33,223<br>Mean: 11,968<br>Median:10,336 |
| <b>Illinois</b>      | 63  | 586,783 | Min/Max:0/34,453<br>Mean: 11,787<br>Median:9,886  |
| <b>Indiana</b>       | 40  | 591,389 | Min/Max:0/34,786<br>Mean:12,642<br>Median:12,067  |
| <b>Iowa</b>          | 34  | 393,034 | Min/Max:0/39,633<br>Mean:14,215<br>Median:13,721  |
| <b>Kansas</b>        | 16  | 586,783 | Min/Max:0/30,126<br>Mean:9,349<br>Median:6,815    |
| <b>Kentucky</b>      | 8   | 591,389 | Min/Max:0/34,089<br>Mean:12,514<br>Median:10,747  |
| <b>Louisiana</b>     | 35  | 450,334 | Min/Max:0/31,522<br>Mean:11,766<br>Median:11,218  |
| <b>Maine</b>         | 33  | 203,152 | Min/Max:0/31,871<br>Mean:9,158<br>Median:7,361    |
| <b>Maryland</b>      | 143 | 860,122 | Min/Max:0/35,097<br>Mean:11,237<br>Median:8,856   |
| <b>Massachusetts</b> | 123 | 775,583 | Min/Max:0/34,688<br>Mean:10,350<br>Median:7,988   |
| <b>Michigan</b>      | 71  | 637,766 | Min/Max:0/37,905<br>Mean:12,011<br>Median:10,986  |
| <b>Minnesota</b>     | 66  | 749,580 | Min/Max:0/34,452<br>Mean:12,324<br>Median:11,255  |
| <b>Mississippi</b>   | 3   | 21,728  | Min/Max:0/21,322<br>Mean:9,763<br>Median:9,183    |

|                       |     |           |                                                  |
|-----------------------|-----|-----------|--------------------------------------------------|
| <b>Missouri</b>       | 14  | 148,132   | Min/Max:0/32,188<br>Mean: 10,075<br>Median:8,072 |
| <b>Montana</b>        | 53  | 358,730   | Min/Max:0/34,788<br>Mean:10,902<br>Median:8,160  |
| <b>Nebraska</b>       | 8   | 131,600   | Min/Max:1/34,592<br>Mean:13,739<br>Median:11,910 |
| <b>Nevada</b>         | 124 | 1,042,406 | Min/Max:0/28,064<br>Mean:9,045<br>Median:6,670   |
| <b>New Hampshire</b>  | 18  | 220,990   | Min/Max:0/37,804<br>Mean:15,690<br>Median:15,460 |
| <b>New Jersey</b>     | 34  | 376,849   | Min/Max:0/35,119<br>Mean:10,891<br>Median:9,235  |
| <b>New Mexico</b>     | 53  | 594,760   | Min/Max:0/34,669<br>Mean:12,485<br>Median:10,494 |
| <b>New York</b>       | 113 | 1,026,533 | Min/Max:0/34,090<br>Mean:11,097<br>Median:9,699  |
| <b>North Carolina</b> | 176 | 2,105,292 | Min/Max:0/39,123<br>Mean:12,444<br>Median:10,699 |
| <b>North Dakota</b>   | 4   | 9,824     | Min/Max:1/10,742<br>Mean: 5,927<br>Median:5,831  |
| <b>Ohio</b>           | 63  | 762,122   | Min/Max:0/34,668<br>Mean:11,430<br>Median: 9,710 |
| <b>Oklahoma</b>       | 16  | 198,650   | Min/Max:0/35,097<br>Mean:12,808<br>Median:10,674 |
| <b>Oregon</b>         | 490 | 4,731,279 | Min/Max:0/35,245<br>Mean:10,924<br>Median:8,893  |
| <b>Pennsylvania</b>   | 242 | 2,700,209 | Min/Max:0/34,450<br>Mean:12,364<br>Median:11,210 |

|                       |     |           |                                                   |
|-----------------------|-----|-----------|---------------------------------------------------|
| <b>Rhode Island</b>   | 7   | 97,820    | Min/Max:1/24,700<br>Mean: 12,533<br>Median:12,378 |
| <b>South Carolina</b> | 19  | 249,528   | Min/Max:0/33,611<br>Mean:11,501<br>Median:9,881   |
| <b>South Dakota</b>   | 5   | 123,915   | Min/Max:0/34,687<br>Mean:16,455<br>Median:16,431  |
| <b>Tennessee</b>      | 38  | 378,017   | Min/Max:0/32,475<br>Mean:10,606<br>Median:8,541   |
| <b>Texas</b>          | 215 | 2,216,316 | Min/Max:0/34,786<br>Mean:11,973<br>Median:10,260  |
| <b>Utah</b>           | 492 | 7,640,288 | Min/Max:0/39,873<br>Mean:13,670<br>Median:12,735  |
| <b>Vermont</b>        | 10  | 121,301   | Min/Max:0/34,687<br>Mean:12,310<br>Median:9,612   |
| <b>Virginia</b>       | 80  | 910,758   | Min/Max:0/35,097<br>Mean:11,954<br>Median:10,989  |
| <b>Washington</b>     | 677 | 5,787,583 | Min/Max:0/35,244<br>Mean:10,324<br>Median: 7,676  |
| <b>West Virginia</b>  | 16  | 183,751   | Min/Max:0/34,689<br>Mean:12,177<br>Median:10,178  |
| <b>Wisconsin</b>      | 56  | 604,028   | Min/Max:0/33,275<br>Mean:11,427<br>Median: 10,189 |
| <b>Wyoming</b>        | 33  | 156,177   | Min/Max:0/32,212<br>Mean: 6,101<br>Median: 4,678  |

**Table S2:** Summary statistics of measurements and period of operation of PurpleAir monitors considered in this study by climate

|  |                                             |                                                         |
|--|---------------------------------------------|---------------------------------------------------------|
|  | <b>All (Including flagged measurements)</b> | <b>Co-located (After removing flagged measurements)</b> |
|--|---------------------------------------------|---------------------------------------------------------|



|             | Number of monitors | Number of measurements | Hours of operation per monitor (Min/Max, Mean, Median) | Min/Mean/Median/Max PM <sub>2.5</sub> concentrations reported by PurpleAir (% of measurements > 100 µg/m³) | Number of monitors | Number of measurements | Hours of operation per monitor (Min/Max, Mean, Median) | Min/Mean/Median/Max PM <sub>2.5</sub> concentrations reported by PurpleAir (% of measurements > 100 µg/m³) |
|-------------|--------------------|------------------------|--------------------------------------------------------|------------------------------------------------------------------------------------------------------------|--------------------|------------------------|--------------------------------------------------------|------------------------------------------------------------------------------------------------------------|
| Cold        | 2,458              | 26,704,292             | Min/Max:0/39,873<br>Mean: 12,163<br>Median: 10,795     | 0/9/4/1454 (0.5%)                                                                                          | 39                 | 345,425                | Min/Max:0/37,803<br>Mean: 14,066<br>Median: 13,307     | 0/13/8/1295 (0.5%)                                                                                         |
| Hot-Dry     | 2,680              | 27,210,216             | Min/Max:0/40,077<br>Mean: 11,487<br>Median:9,404       | 0/13/6/1459 (1.1%)                                                                                         | 72                 | 603,505                | Min/Max:0/35,289<br>Mean:15,444<br>Median: 14,414      | 0/15/8/773 (0.7%)                                                                                          |
| Hot-Humid   | 281                | 3,243,029              | Min/Max:0/37,281<br>Mean: 12,273<br>Median: 11,027     | 0/11/8/1105 (0.1%)                                                                                         | 1                  | 15,432                 | Min/Max:0/21,661<br>Mean: 12,893<br>Median: 12,572     | 0/8/5/216 (0.1%)                                                                                           |
| Marine      | 4,842              | 41,448,103             | Min/Max: 0/39,892<br>Mean: 8,644<br>Median: 6,178      | 0/10/4/1457 (1.0%)                                                                                         | 21                 | 318,255                | Min/Max: 0/34,594<br>Mean: 14,641<br>Median: 13,648    | 0/12/6/1050 (0.7%)                                                                                         |
| Mixed-Dry   | 361                | 3,527,237              | Min/Max: 0/37,805<br>Mean: 12,197<br>Median: 10,786    | 0/11/4/1445 (1.7%)                                                                                         | 2                  | 35,041                 | Min/Max:1/26,359<br>Mean: 15,424<br>Median: 16,109     | 0/8/1/586 (1.7%)                                                                                           |
| Mixed-Humid | 750                | 6,959,785              | Min/Max: 0/39,123<br>Mean: 11,389<br>Median: 9,434     | 0/12/9/1113 (0.3%)                                                                                         | 16                 | 145,498                | Min/Max: 0/30,827<br>Mean: 9,932<br>Median: 8,386      | 0/13/10/247 (0.1%)                                                                                         |
| Subarctic   | 58                 | 839,563                | Min/Max:0/30,029<br>Mean:11,324<br>Median: 11,054      | 0/7/2/1292 (0.7%)                                                                                          | -                  | -                      | -                                                      | -                                                                                                          |
| Very Cold   | 108                | 991,326                | Min/Max:0/34,946<br>Mean: 11,242<br>Median: 10,326     | 0/5/2/859 (0.3%)                                                                                           | -                  | -                      | -                                                      | -                                                                                                          |
| NA          | 394                | 3,336,389              | Min/Max:0/36,294<br>Mean: 9,684<br>Median: 6,709       | 0/9/4/1206 (0.7%)                                                                                          | -                  | -                      | -                                                      | -                                                                                                          |
| Outside     |                    |                        |                                                        |                                                                                                            |                    |                        |                                                        |                                                                                                            |
|             | Number of monitors | Number of measurements | Hours of operation per monitor (Min/Max, Mean, Median) | Min/Mean/Median/Max PM <sub>2.5</sub> concentrations                                                       | -                  | -                      | -                                                      | -                                                                                                          |

|                    |       |            |                                                     | reported by<br>PurpleAir<br>(% of<br>measurements > 100<br>µg/m³) |   |   |   |   |
|--------------------|-------|------------|-----------------------------------------------------|-------------------------------------------------------------------|---|---|---|---|
| <b>Cold</b>        | 2,333 | 25,584,998 | Min/Max:0/39,873<br>Mean: 12,165<br>Median: 10,790  | 0/10/4/1455<br>(0.5%)                                             | - | - | - | - |
| <b>Hot-Dry</b>     | 2,464 | 25,154,043 | Min/Max: 0/40,077<br>Mean: 11,547<br>Median: 9,473  | 0/14/7/1459<br>(1.1%)                                             | - | - | - | - |
| <b>Hot-Humid</b>   | 268   | 3,134,869  | Min/Max: 0/37,281<br>Mean: 12,407<br>Median: 11,182 | 0/11/8/1105<br>(0.1%)                                             | - | - | - | - |
| <b>Marine</b>      | 4,372 | 37,247,271 | Min/Max:0/39,892<br>Mean: 8,627<br>Median: 6,155    | 0/10/5/1457<br>(1.1%)                                             | - | - | - | - |
| <b>Mixed-Dry</b>   | 337   | 3,325,742  | Min/Max: 0/37,805<br>Mean: 12,064<br>Median: 10,584 | 0/12/4/1445<br>(1.8%)                                             | - | - | - | - |
| <b>Mixed-Humid</b> | 697   | 6,590,197  | Min/Max: 0/39,123<br>Mean: 11,539<br>Median: 9,630  | 0/12/9/991<br>(0.2%)                                              | - | - | - | - |
| <b>Subarctic</b>   | 57    | 835,664    | Min/Max: 0/30,029<br>Mean: 11,347<br>Median: 11,096 | 0/7/2/1292<br>(0.7%)                                              | - | - | - | - |
| <b>Very Cold</b>   | 106   | 968,988    | Min/Max: 0/34,946<br>Mean: 11,295<br>Median: 10,383 | 0/5/2/859<br>(0.3%)                                               | - | - | - | - |
| <b>NA</b>          | 363   | 3,106,013  | Min/Max:0/36,294<br>Mean: 9,766<br>Median: 6,810    | 0/9/4/1206<br>(0.7%)                                              | - | - | - | - |

**Table S3:** Performance of the correction models as captured using root mean square error (RMSE), and Pearson correlation (R ). LOSO CV was used to prevent overfitting in the random forest models. A detailed description of the correction models proposed can be found in (deSouza et al., 2022). Model 2 corresponds to the correction model described using Equation (1)

| Model Number | Name                              | Equation                                                                           | Evaluating Correction Model |               | Summary of error: Mean (Median) (µg/m³) |                                                                                      |
|--------------|-----------------------------------|------------------------------------------------------------------------------------|-----------------------------|---------------|-----------------------------------------|--------------------------------------------------------------------------------------|
|              |                                   |                                                                                    | R                           | RMS E (µg/m³) |                                         |                                                                                      |
|              | Raw PurpleAir measurements        |                                                                                    |                             |               |                                         |                                                                                      |
| 0            | Raw                               |                                                                                    | 0.88                        | 12.5          | 3.89 (0.95)                             | 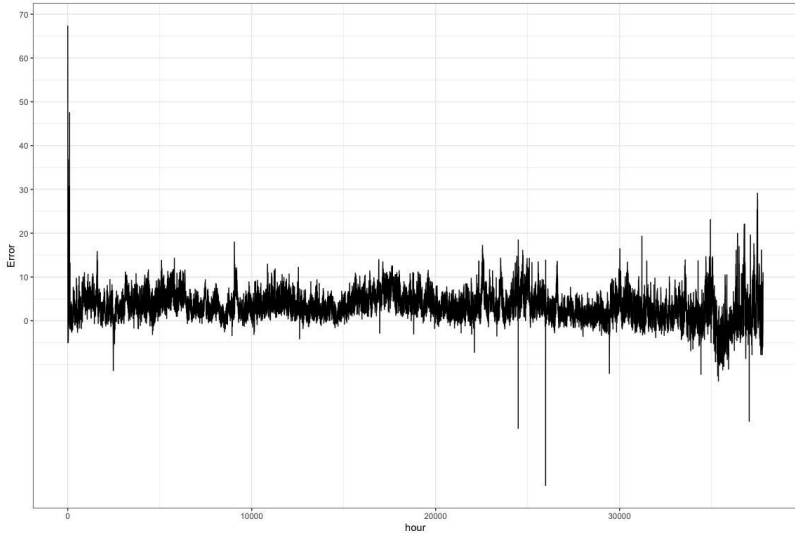  |
|              | Multivariate Regression (LOSO CV) |                                                                                    |                             |               |                                         |                                                                                      |
| 1            | Linear                            | $\text{PM}_{2.5, \text{corrected}} = \text{PM}_{2.5} \times s_1 + b + \varepsilon$ | 0.88                        | 6.8           | 3.4 (2.2)                               |  |

|   |     |                                                                                                           |      |     |              |                                                                                     |
|---|-----|-----------------------------------------------------------------------------------------------------------|------|-----|--------------|-------------------------------------------------------------------------------------|
| 2 | +RH | $\text{PM}_{2.5, \text{corrected}} = \text{PM}_{2.5} \times s_1 + \text{RH} \times s_2 + b + \varepsilon$ | 0.89 | 6.6 | 3.3<br>(2.2) | 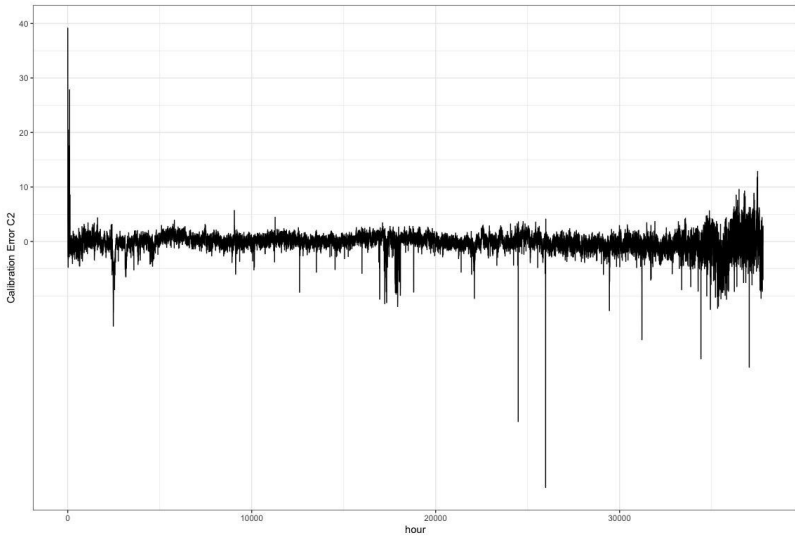  |
| 3 | +T  | $\text{PM}_{2.5, \text{corrected}} = \text{PM}_{2.5} \times s_1 + T \times s_2 + b + \varepsilon$         | 0.88 | 6.7 | 3.3<br>(2.2) |  |

|   |         |                                                                                                                               |      |     |              |  |
|---|---------|-------------------------------------------------------------------------------------------------------------------------------|------|-----|--------------|--|
| 4 | +RH x T | $PM_{2.5, \text{ corrected}} = PM_{2.5} \times s_1 + RH \times s_2 + T \times s_3 + RH \times T \times s_4 + b + \varepsilon$ | 0.89 | 6.6 | 3.3<br>(2.3) |  |
| 5 | PM x RH | $PM_{2.5, \text{ corrected}} = PM_{2.5} \times s_1 + RH \times s_2 + RH \times PM_{2.5} \times s_3 + b + \varepsilon$         | 0.89 | 6.4 | 3.1<br>(2.0) |  |



|   |                   |                                                                                                                                                                                                          |      |     |              |  |
|---|-------------------|----------------------------------------------------------------------------------------------------------------------------------------------------------------------------------------------------------|------|-----|--------------|--|
| 6 | PM x T            | $\text{PM}_{2.5, \text{ corrected}} = \text{PM}_{2.5} \times s_1 + T \times s_2 + T \times \text{PM}_{2.5} \times s_3 + b + \varepsilon$                                                                 | 0.88 | 6.7 | 3.3<br>(2.2) |  |
| 7 | PM x nonlinear RH | $\text{PM}_{2.5, \text{ corrected}} = \text{PM}_{2.5} \times s_1 + \frac{\text{RH}^2}{(1-\text{RH})} \times s_2 + \frac{\text{RH}^2}{(1-\text{RH})} \times \text{PM}_{2.5} \times s_3 + b + \varepsilon$ | 0.88 | 6.7 | 3.3<br>(2.2) |  |

|                            |                |                                                                                                                                                                                                                                      |      |     |              |  |
|----------------------------|----------------|--------------------------------------------------------------------------------------------------------------------------------------------------------------------------------------------------------------------------------------|------|-----|--------------|--|
| 8                          | PM x RH<br>x T | $PM_{2.5, \text{corrected}} = PM_{2.5} \times s_1 + RH \times s_2 + T \times s_3 + PM_{2.5} \times RH \times s_4 + PM_{2.5} \times T \times s_5 + RH \times T \times s_6 + PM_{2.5} \times RH \times T \times s_7 + b + \varepsilon$ | 0.90 | 6.2 | 3.1<br>(2.1) |  |
| Machine Learning (LOSO CV) |                |                                                                                                                                                                                                                                      |      |     |              |  |
| 9                          | Random Forest  | $PM_{2.5, \text{corrected}} = f(PM_{2.5}, T, RH)$                                                                                                                                                                                    | 0.99 | 2.4 | 1.3<br>(0.9) |  |

**Table S4:** Associations between the correction error and year of operation

|                                        | Associations (95% Confidence Interval) |                          |                          |                          |                          |                          |                          |                          |                          |
|----------------------------------------|----------------------------------------|--------------------------|--------------------------|--------------------------|--------------------------|--------------------------|--------------------------|--------------------------|--------------------------|
| Dataset                                | Model 1                                | Model 2                  | Model 3                  | Model 4                  | Model 5                  | Model 6                  | Model 7                  | Model 8                  | Model 9                  |
| All                                    | -0.28*<br>(-0.29, -0.27)               | -0.12*<br>(-0.13, -0.10) | -0.17*<br>(-0.18, -0.16) | -0.08*<br>(-0.10, -0.07) | -0.07*<br>(-0.08, -0.06) | -0.16*<br>(-0.17, -0.15) | -0.23*<br>(-0.24, -0.22) | -0.04*<br>(-0.05, -0.03) | -0.05*<br>(-0.05, -0.05) |
| Climate Zone<br>(Outside Devices Only) |                                        |                          |                          |                          |                          |                          |                          |                          |                          |
| Cold                                   | -0.26*<br>(-0.29, -0.24)               | -0.27*<br>(-0.29, -0.25) | -0.19*<br>(-0.21, -0.17) | -0.21*<br>(-0.23, -0.19) | -0.20*<br>(-0.22, -0.18) | -0.20*<br>(-0.22, -0.17) | -0.22*<br>(-0.24, -0.20) | -0.14*<br>(-0.16, -0.12) | -0.08*<br>(-0.08, -0.07) |

|                    |                          |                          |                          |                          |                          |                          |                          |                          |                          |
|--------------------|--------------------------|--------------------------|--------------------------|--------------------------|--------------------------|--------------------------|--------------------------|--------------------------|--------------------------|
| <b>Hot-Dry</b>     | 0.03*<br>(0.02, 0.05)    | 0.08*<br>(0.06, 0.09)    | 0.09*<br>(0.08, 0.11)    | 0.10*<br>(0.09, 0.12)    | 0.13*<br>(0.11, 0.14)    | 0.11*<br>(0.09, 0.13)    | 0.04*<br>(0.03, 0.06)    | 0.13*<br>(0.11, 0.14)    | 0.01<br>(-0.00, 0.01)    |
| <b>Hot-Humid</b>   | -0.86*<br>(-1.04, -0.68) | -0.92*<br>(-1.10, -0.75) | -0.89*<br>(-1.06, -0.71) | -0.93*<br>(-1.10, -0.76) | -0.88*<br>(-1.05, -0.71) | -0.89*<br>(-1.06, -0.71) | -0.86*<br>(-1.04, -0.69) | -0.90*<br>(-1.06, -0.73) | -0.35*<br>(-0.41, -0.28) |
| <b>Marine</b>      | -0.40*<br>(-0.43, -0.38) | -0.13*<br>(-0.15, -0.10) | -0.27*<br>(-0.29, -0.24) | -0.07*<br>(-0.09, -0.04) | -0.07*<br>(-0.10, -0.05) | -0.24*<br>(-0.27, -0.22) | -0.29*<br>(-0.32, -0.27) | -0.01<br>(-0.04, 0.01)   | -0.02*<br>(-0.03, -0.01) |
| <b>Mixed-Dry</b>   | -0.93*<br>(-1.03, -0.84) | -0.31*<br>(-0.40, -0.21) | -0.53*<br>(-0.63, -0.44) | -0.28*<br>(-0.37, -0.18) | -0.27*<br>(-0.36, -0.18) | -0.56*<br>(-0.66, -0.47) | -0.83*<br>(-0.92, -0.74) | -0.29*<br>(-0.37, -0.20) | -0.34*<br>(-0.37, -0.30) |
| <b>Mixed-Humid</b> | -0.46*<br>(-0.51, -0.41) | -0.28*<br>(-0.33, -0.23) | -0.32*<br>(-0.37, -0.27) | -0.20*<br>(-0.25, -0.16) | -0.20*<br>(-0.25, -0.16) | -0.29*<br>(-0.34, -0.24) | -0.39*<br>(-0.44, -0.35) | -0.13*<br>(-0.17, -0.08) | -0.01<br>(-0.03, 0.00)   |

(\*p< 0.05)

**Table S5:** Results from regressing hour and interaction of hour and the cumulative number of high PM<sub>2.5</sub> measurements recorded on correction error

|                                                   | Coefficients (95% CI)                                                             |                                                                                   |                          |
|---------------------------------------------------|-----------------------------------------------------------------------------------|-----------------------------------------------------------------------------------|--------------------------|
| <b>Intercept</b>                                  | -1,566*<br>(-1,774, -1,357)                                                       | 867.2*<br>(674.8, 1059.5)                                                         | 801.9*<br>(618.5, 985.3) |
| <b>Hour</b>                                       | -0.18*<br>(-0.19, -0.17)                                                          | -0.15*<br>(-0.17, -0.14)                                                          | -0.05*<br>(-0.06, -0.04) |
| <b>Cumulative PM<sub>2.5</sub> &gt; 50</b>        | 29.5*<br>(28.8, 30.1)                                                             |                                                                                   | -                        |
| <b>Cumulative PM<sub>2.5</sub> &gt; 100</b>       | -                                                                                 | 57.7*<br>(54.8, 60.5)                                                             | -                        |
| <b>Cumulative PM<sub>2.5</sub> &gt; 500</b>       | -                                                                                 | -                                                                                 | 864.4*<br>(832.0, 896.7) |
| <b>Hour: Cumulative PM<sub>2.5</sub> &gt; 50</b>  | -9.0 x 10 <sup>-4</sup> *<br>(-9.2 x 10 <sup>-4</sup> , -8.7 x 10 <sup>-4</sup> ) | -                                                                                 | -                        |
| <b>Hour: Cumulative PM<sub>2.5</sub> &gt; 100</b> | -                                                                                 | -1.5 x 10 <sup>-3</sup> *<br>(-1.7 x 10 <sup>-3</sup> , -1.4 x 10 <sup>-5</sup> ) | -                        |
| <b>Hour: Cumulative PM<sub>2.5</sub> &gt; 500</b> | -                                                                                 | -                                                                                 | -0.06*<br>(-0.07, -0.06) |

(\*p< 0.05)

**Table S6:** Results from regressing hour and interaction of hour and the cumulative number of high PM<sub>2.5</sub> measurements recorded on normalized correction error

|                  | Coefficients (95% CI)     |                           |                           |
|------------------|---------------------------|---------------------------|---------------------------|
| <b>Intercept</b> | 7,306*<br>(2,125, 12,488) | 6,601*<br>(1,842, 11,359) | 8,263*<br>(3,727, 12,799) |
| <b>Hour</b>      | 0.6*                      | 0.5*                      | 0.5*                      |

|                                                   |                                                                                |                                                                                |                                                                              |
|---------------------------------------------------|--------------------------------------------------------------------------------|--------------------------------------------------------------------------------|------------------------------------------------------------------------------|
|                                                   | (0.3, 0.9)                                                                     | (0.2, 0.8)                                                                     | (0.2, 0.8)                                                                   |
| <b>Cumulative PM<sub>2.5</sub> &gt; 50</b>        | 2.9<br>(-14.1, 19.8)                                                           | -                                                                              | -                                                                            |
| <b>Cumulative PM<sub>2.5</sub> &gt; 100</b>       | -                                                                              | 90<br>(19, 160)                                                                | -                                                                            |
| <b>Cumulative PM<sub>2.5</sub> &gt; 500</b>       | -                                                                              | -                                                                              | -238.9<br>(-1039.4, 561.6)                                                   |
| <b>Hour: Cumulative PM<sub>2.5</sub> &gt; 50</b>  | -1.6 x 10 <sup>-4</sup><br>(-8.3 x 10 <sup>-4</sup> , 5.1 x 10 <sup>-4</sup> ) | -                                                                              | -                                                                            |
| <b>Hour: Cumulative PM<sub>2.5</sub> &gt; 100</b> | -                                                                              | -2.6 x 10 <sup>-3</sup><br>(-5.5 x 10 <sup>-3</sup> , 0.2 x 10 <sup>-3</sup> ) | -                                                                            |
| <b>Hour: Cumulative PM<sub>2.5</sub> &gt; 500</b> | -                                                                              | -                                                                              | 8.2 x 10 <sup>-3</sup><br>(-5.0 x 10 <sup>-2</sup> , 6.7 x10 <sup>-2</sup> ) |

(\* $p < 0.05$ )
